# Supplementary material for: Dopant induced modulation in the structure and electronic properties of Au10 cluster
Source: Royal Society of Chemistry journal article supplement (doi:10.1039/c6ra20808h), 2016-01-01
Supplement: c6ra20808h1.pdf [file c6ra20808h1.pdf]

**Electronic supporting information for  
Dopant induced modulation in the structure and electronic properties  
of Au<sub>10</sub> cluster**

Lovepreet Singh Sidhu,<sup>a</sup> Antarip Halder,<sup>a</sup> and Sandhya Rai <sup>\*,b</sup>

<sup>a</sup>Center for Computational Natural Sciences and Bioinformatics, International Institute of Information Technology Hyderabad, Gachibowli, Hyderabad, 500032, Telangana, India.

<sup>b</sup>Theoretical Science Unit, Jawaharlal Nehru Centre for Advanced Scientific Research, Jakkur, Bengaluru, 560064, Karnataka, India

---

**(1) Numeric values of different structural and electronic properties of the doped Au<sub>9</sub>X clusters:**

**(i) RMSD with pure Au<sub>10</sub> cluster (in Å)**

(a) Alkali dopants

| CLUSTER | Au <sub>9</sub> Li | Au <sub>9</sub> Na | Au <sub>9</sub> K | Au <sub>9</sub> Rb |
|---------|--------------------|--------------------|-------------------|--------------------|
| Site A  | 0.07               | 0.10               | 0.26              | 1.26               |
| Site B  | 0.07               | 0.10               | 1.70              | 1.69               |
| Site C  | 0.06               | 0.16               | 0.38              | 0.63               |
| Site D  | 0.058              | 1.28               | 1.26              | 1.38               |

(b) Alkaline earth dopants

| CLUSTER | Au <sub>9</sub> Be | Au <sub>9</sub> Mg | Au <sub>9</sub> Ca | Au <sub>9</sub> Sr |
|---------|--------------------|--------------------|--------------------|--------------------|
| Site A  | 0.38               | 0.09               | 0.12               | 0.41               |
| Site B  | 1.03               | 0.09               | 0.07               | 0.09               |
| Site C  | 0.37               | 0.09               | 0.17               | 0.21               |
| Site D  | 0.62               | 0.04               | 0.33               | 0.41               |

**(ii) Binding Energy (in eV)**BE of Au<sub>10</sub> = -1.659**(a) Alkali dopants**

| CLUSTER | Au <sub>9</sub> Li | Au <sub>9</sub> Na | Au <sub>9</sub> K | Au <sub>9</sub> Rb |
|---------|--------------------|--------------------|-------------------|--------------------|
| Site A  | -1.692             | -1.654             | -1.657            | -1.667             |
| Site B  | -1.713             | -1.675             | -1.711            | -1.700             |
| Site C  | -1.691             | -1.646             | -1.645            | -1.637             |
| Site D  | -1.715             | -1.695             | -1.712            | -1.685             |

**(b) Alkaline earth dopants**

| CLUSTER | Au <sub>9</sub> Be | Au <sub>9</sub> Mg | Au <sub>9</sub> Ca | Au <sub>9</sub> Sr |
|---------|--------------------|--------------------|--------------------|--------------------|
| Site A  | -1.724             | -1.610             | -1.652             | -1.702             |
| Site B  | -1.807             | -1.598             | -1.645             | -1.703             |
| Site C  | -1.775             | -1.648             | -1.692             | -1.734             |
| Site D  | -1.835             | -1.692             | -1.740             | -1.796             |

**(iii) Interaction Energy (in eV)**IE of Au<sub>10</sub> = -2.382**(a) Alkali dopants**

| CLUSTER | Au <sub>9</sub> Li | Au <sub>9</sub> Na | Au <sub>9</sub> K | Au <sub>9</sub> Rb |
|---------|--------------------|--------------------|-------------------|--------------------|
| Site A  | -2.715             | -2.329             | -2.362            | -2.464             |
| Site B  | -2.920             | -2.543             | -2.915            | -2.799             |
| Site C  | -2.717             | -2.250             | -2.247            | -2.160             |
| Site D  | -2.942             | -2.749             | -2.911            | -2.646             |

**(b) Alkaline earth dopants**

| CLUSTER | Au <sub>9</sub> Be | Au <sub>9</sub> Mg | Au <sub>9</sub> Ca | Au <sub>9</sub> Sr |
|---------|--------------------|--------------------|--------------------|--------------------|
| Site A  | -3.032             | -1.891             | -2.313             | -2.818             |
| Site B  | -3.866             | -1.770             | -2.248             | -2.825             |
| Site C  | -3.545             | -2.276             | -2.710             | -3.136             |
| Site D  | -4.143             | -2.713             | -3.195             | -3.759             |

**(iv) Au-X bond length (in Å)**

Average Au-Au bond length = 2.758

**(a) Alkali dopants**

| CLUSTER | Au <sub>9</sub> Li | Au <sub>9</sub> Na | Au <sub>9</sub> K | Au <sub>9</sub> Rb |
|---------|--------------------|--------------------|-------------------|--------------------|
| Site A  | 2.577              | 2.846              | 3.208             | 3.327              |
| Site B  | 2.598              | 2.883              | 3.226             | 3.372              |
| Site C  | 2.649              | 2.940              | 3.310             | 3.474              |
| Site D  | 2.579              | 2.945              | 3.236             | 3.513              |

**(b) Alkaline earth dopants**

| CLUSTER | Au <sub>9</sub> Be | Au <sub>9</sub> Mg | Au <sub>9</sub> Ca | Au <sub>9</sub> Sr |
|---------|--------------------|--------------------|--------------------|--------------------|
| Site A  | 2.130              | 2.582              | 2.908              | 2.931              |
| Site B  | 2.173              | 2.679              | 2.918              | 2.956              |
| Site C  | 2.215              | 2.609              | 2.929              | 3.011              |
| Site D  | 2.255              | 2.689              | 2.957              | 3.065              |

**(v) Ionic Character of the Au-X bond (difference of partial atomic charges, obtained from Natural Population Analysis, between Au and X). All values are in a.u.****(a) Alkali dopants**

| CLUSTER | Au <sub>9</sub> Li | Au <sub>9</sub> Na | Au <sub>9</sub> K | Au <sub>9</sub> Rb |
|---------|--------------------|--------------------|-------------------|--------------------|
| Site A  | 0.958              | 1.007              | 1.253             | 0.980              |
| Site B  | 0.689              | 1.092              | 0.872             | 0.905              |
| Site C  | 0.707              | 0.717              | 1.205             | 0.977              |
| Site D  | 0.676              | 0.942              | 0.871             | 1.161              |

**(b) Alkaline earth dopants**

| CLUSTER | Au <sub>9</sub> Be | Au <sub>9</sub> Mg | Au <sub>9</sub> Ca | Au <sub>9</sub> Sr |
|---------|--------------------|--------------------|--------------------|--------------------|
| Site A  | 0.847              | 0.879              | 1.289              | 1.642              |
| Site B  | 0.972              | 0.870              | 1.165              | 1.780              |

|        |       |       |       |       |
|--------|-------|-------|-------|-------|
| Site C | 0.860 | 1.205 | 1.768 | 1.941 |
| Site D | 0.869 | 1.361 | 1.836 | 1.938 |

**(vi) HOMO-LUMO gap (in eV)**

E(HOMO) - E(LUMO) of Au<sub>10</sub> = -2.56331237

(a) Alkali dopants

| CLUSTER | Au <sub>9</sub> Li | Au <sub>9</sub> Na | Au <sub>9</sub> K | Au <sub>9</sub> Rb |
|---------|--------------------|--------------------|-------------------|--------------------|
| Site A  | -2.125             | -2.093             | -1.971            | -1.905             |
| Site B  | -2.280             | -2.239             | -2.231            | -2.144             |
| Site C  | -2.354             | -2.324             | -2.199            | -2.272             |
| Site D  | -2.419             | -2.650             | -2.250            | -2.117             |

(b) Alkaline earth dopants

| CLUSTER | Au <sub>9</sub> Be | Au <sub>9</sub> Mg | Au <sub>9</sub> Ca | Au <sub>9</sub> Sr |
|---------|--------------------|--------------------|--------------------|--------------------|
| Site A  | -2.403             | -2.547             | -2.357             | -2.269             |
| Site B  | -2.449             | -2.607             | -2.444             | -2.522             |
| Site C  | -2.215             | -2.408             | -2.278             | -2.291             |
| Site D  | -2.117             | -2.313             | -2.199             | -2.215             |

**(vii) Vertical Ionization Potential (in eV)**

VIP of Au<sub>10</sub> = 7.401

(a) Alkali dopants

| CLUSTER | Au <sub>9</sub> Li | Au <sub>9</sub> Na | Au <sub>9</sub> K | Au <sub>9</sub> Rb |
|---------|--------------------|--------------------|-------------------|--------------------|
| Site A  | 6.769              | 6.622              | 6.308             | 6.264              |
| Site B  | 6.849              | 6.680              | 6.637             | 6.507              |
| Site C  | 7.171              | 7.050              | 6.791             | 6.616              |
| Site D  | 7.412              | 7.195              | 6.668             | 6.505              |

(b) Alkaline earth dopants

| CLUSTER | Au <sub>9</sub> Be | Au <sub>9</sub> Mg | Au <sub>9</sub> Ca | Au <sub>9</sub> Sr |
|---------|--------------------|--------------------|--------------------|--------------------|
| Site A  | 6.317              | 6.037              | 5.718              | 5.672              |

|        |       |       |       |       |
|--------|-------|-------|-------|-------|
| Site B | 6.302 | 5.798 | 5.432 | 5.430 |
| Site C | 6.489 | 6.252 | 6.007 | 5.971 |
| Site D | 6.545 | 6.225 | 6.175 | 6.149 |

**(viii) Vertical Electron Affinity (in eV)**

VEA of Au<sub>10</sub> = 2.560

(a) Alkali dopants

| CLUSTER | Au <sub>9</sub> Li | Au <sub>9</sub> Na | Au <sub>9</sub> K | Au <sub>9</sub> Rb |
|---------|--------------------|--------------------|-------------------|--------------------|
| Site A  | 2.377              | 2.287              | 2.126             | 2.093              |
| Site B  | 2.291              | 2.184              | 2.111             | 2.078              |
| Site C  | 2.539              | 2.467              | 2.367             | 2.112              |
| Site D  | 2.665              | 2.207              | 2.122             | 2.144              |

(b) Alkaline earth dopants

| CLUSTER | Au <sub>9</sub> Be | Au <sub>9</sub> Mg | Au <sub>9</sub> Ca | Au <sub>9</sub> Sr |
|---------|--------------------|--------------------|--------------------|--------------------|
| Site A  | 2.695              | 2.448              | 2.181              | 2.031              |
| Site B  | 2.330              | 2.459              | 2.331              | 1.997              |
| Site C  | 2.532              | 2.534              | 2.375              | 2.266              |
| Site D  | 2.100              | 2.437              | 2.132              | 2.150              |

**(ix) Polarizability (in Bohr<sup>3</sup>)**

Polarizability of Au<sub>10</sub> = 438.221

(a) Alkali dopants

| CLUSTER | Au <sub>9</sub> Li | Au <sub>9</sub> Na | Au <sub>9</sub> K | Au <sub>9</sub> Rb |
|---------|--------------------|--------------------|-------------------|--------------------|
| Site A  | 432.839            | 446.076            | 459.817           | 437.636            |
| Site B  | 433.913            | 449.179            | 410.754           | 417.617            |
| Site C  | 428.706            | 442.823            | 454.212           | 452.132            |
| Site D  | 427.617            | 390.746            | 410.826           | 426.573            |

(b) Alkaline earth dopants

| CLUSTER | Au <sub>9</sub> Be | Au <sub>9</sub> Mg | Au <sub>9</sub> Ca | Au <sub>9</sub> Sr |
|---------|--------------------|--------------------|--------------------|--------------------|
|---------|--------------------|--------------------|--------------------|--------------------|

|        |         |         |         |         |
|--------|---------|---------|---------|---------|
| Site A | 434.375 | 479.8   | 550.650 | 511.257 |
| Site B | 430.333 | 497.751 | 545.178 | 525.518 |
| Site C | 439.656 | 474.567 | 518.658 | 516.231 |
| Site D | 418.733 | 438.373 | 452.172 | 452.376 |

**(x) Dipole moment (in Debye)**

Dipole moment of Au<sub>10</sub> = 0.000812

**(a) Alkali dopants**

| CLUSTER | Au <sub>9</sub> Li | Au <sub>9</sub> Na | Au <sub>9</sub> K | Au <sub>9</sub> Rb |
|---------|--------------------|--------------------|-------------------|--------------------|
| Site A  | 4.568248           | 6.601558           | 10.44581          | 8.894163           |
| Site B  | 5.440708           | 7.606711           | 5.985647          | 7.426224           |
| Site C  | 2.991256           | 4.423665           | 7.844653          | 9.598922           |
| Site D  | 0.923237           | 3.141660           | 6.039460          | 8.521225           |

**(b) Alkaline earth dopants**

| CLUSTER | Au <sub>9</sub> Be | Au <sub>9</sub> Mg | Au <sub>9</sub> Ca | Au <sub>9</sub> Sr |
|---------|--------------------|--------------------|--------------------|--------------------|
| Site A  | 1.153075           | 3.845194           | 8.896901           | 11.01458           |
| Site B  | 1.965584           | 4.342130           | 10.681590          | 12.096826          |
| Site C  | 1.566928           | 2.504142           | 6.179085           | 8.011196           |
| Site D  | 1.397144           | 0.123153           | 3.510218           | 4.849611           |

**(xi) Coordination number (CN) of the dopant atom**

CN for Au<sub>10</sub> cluster for atoms at site (A), (B), (C) and (D) are 3, 3, 4 and 6 respectively.

Cases where the coordination number has changed due to doping has been mentioned in **red** color.

**(a) Alkali dopants**

| CLUSTER | Au <sub>9</sub> Li | Au <sub>9</sub> Na | Au <sub>9</sub> K | Au <sub>9</sub> Rb |
|---------|--------------------|--------------------|-------------------|--------------------|
| Site A  | 3                  | 3                  | 3                 | <b>6</b>           |
| Site B  | 3                  | 3                  | <b>7</b>          | <b>7</b>           |
| Site C  | 4                  | 4                  | 4                 | 4                  |
| Site D  | 6                  | <b>7</b>           | <b>7</b>          | <b>5</b>           |

(b) Alkaline earth dopants

| CLUSTER | Au <sub>9</sub> Be | Au <sub>9</sub> Mg | Au <sub>9</sub> Ca | Au <sub>9</sub> Sr |
|---------|--------------------|--------------------|--------------------|--------------------|
| Site A  | 3                  | 3                  | 3                  | 3                  |
| Site B  | 4                  | 3                  | 3                  | 3                  |
| Site C  | 4                  | 4                  | 4                  | 4                  |
| Site D  | 6                  | 6                  | 6                  | 6                  |

## (2) Optimized coordinates

### Pure Au<sub>10</sub> cluster

|        |       |     |   |        |        |        |      |      |    |
|--------|-------|-----|---|--------|--------|--------|------|------|----|
| HETATM | 1 AU  | LIG | 1 | -0.411 | -3.406 | -2.673 | 1.00 | 0.00 | Au |
| HETATM | 2 AU  | LIG | 1 | 1.229  | -1.262 | -3.273 | 1.00 | 0.00 | Au |
| HETATM | 3 AU  | LIG | 1 | -0.345 | -1.222 | -1.026 | 1.00 | 0.00 | Au |
| HETATM | 4 AU  | LIG | 1 | 1.299  | 0.930  | -1.616 | 1.00 | 0.00 | Au |
| HETATM | 5 AU  | LIG | 1 | -1.991 | -3.327 | -0.404 | 1.00 | 0.00 | Au |
| HETATM | 6 AU  | LIG | 1 | -0.198 | 3.194  | 2.319  | 1.00 | 0.00 | Au |
| HETATM | 7 AU  | LIG | 1 | 1.368  | 3.123  | 0.040  | 1.00 | 0.00 | Au |
| HETATM | 8 AU  | LIG | 1 | -1.850 | 1.057  | 2.911  | 1.00 | 0.00 | Au |
| HETATM | 9 AU  | LIG | 1 | -1.918 | -1.136 | 1.255  | 1.00 | 0.00 | Au |
| HETATM | 10 AU | LIG | 1 | -0.274 | 1.016  | 0.665  | 1.00 | 0.00 | Au |

### Pure Au<sub>9</sub> cluster

|        |      |     |   |        |        |       |      |      |    |
|--------|------|-----|---|--------|--------|-------|------|------|----|
| HETATM | 1 AU | LIG | 1 | -2.880 | 2.052  | 0.000 | 1.00 | 0.00 | Au |
| HETATM | 2 AU | LIG | 1 | -0.153 | 2.049  | 0.000 | 1.00 | 0.00 | Au |
| HETATM | 3 AU | LIG | 1 | 2.510  | 2.233  | 0.000 | 1.00 | 0.00 | Au |
| HETATM | 4 AU | LIG | 1 | -4.258 | -0.390 | 0.000 | 1.00 | 0.00 | Au |
| HETATM | 5 AU | LIG | 1 | -1.522 | -0.324 | 0.000 | 1.00 | 0.00 | Au |
| HETATM | 6 AU | LIG | 1 | 1.478  | -0.251 | 0.000 | 1.00 | 0.00 | Au |
| HETATM | 7 AU | LIG | 1 | -2.765 | -2.761 | 0.000 | 1.00 | 0.00 | Au |
| HETATM | 8 AU | LIG | 1 | -0.041 | -2.627 | 0.000 | 1.00 | 0.00 | Au |
| HETATM | 9 AU | LIG | 1 | 2.628  | -2.683 | 0.000 | 1.00 | 0.00 | Au |

+++++

### Doped Au<sub>9</sub>Li cluster for doping at site A

|        |       |     |   |        |        |        |      |      |    |
|--------|-------|-----|---|--------|--------|--------|------|------|----|
| HETATM | 1 AU  | LIG | 1 | -0.355 | -3.327 | -2.761 | 1.00 | 0.00 | Au |
| HETATM | 2 LI  | LIG | 1 | 1.187  | -1.309 | -3.196 | 1.00 | 0.00 | Li |
| HETATM | 3 AU  | LIG | 1 | -0.320 | -1.217 | -1.081 | 1.00 | 0.00 | Au |
| HETATM | 4 AU  | LIG | 1 | 1.265  | 0.882  | -1.630 | 1.00 | 0.00 | Au |
| HETATM | 5 AU  | LIG | 1 | -1.970 | -3.260 | -0.352 | 1.00 | 0.00 | Au |
| HETATM | 6 AU  | LIG | 1 | -0.190 | 3.163  | 2.276  | 1.00 | 0.00 | Au |
| HETATM | 7 AU  | LIG | 1 | 1.386  | 3.138  | 0.052  | 1.00 | 0.00 | Au |
| HETATM | 8 AU  | LIG | 1 | -1.863 | 1.066  | 2.934  | 1.00 | 0.00 | Au |
| HETATM | 9 AU  | LIG | 1 | -1.941 | -1.149 | 1.294  | 1.00 | 0.00 | Au |
| HETATM | 10 AU | LIG | 1 | -0.288 | 0.983  | 0.662  | 1.00 | 0.00 | Au |

### Doped Au<sub>9</sub>Li cluster for doping at site B

|         |       |     |   |        |        |        |      |      |    |
|---------|-------|-----|---|--------|--------|--------|------|------|----|
| HHETATM | 1 LI  | LIG | 1 | -0.397 | -3.339 | -2.607 | 1.00 | 0.00 | Li |
| HETATM  | 2 AU  | LIG | 1 | 1.182  | -1.371 | -3.287 | 1.00 | 0.00 | Au |
| HETATM  | 3 AU  | LIG | 1 | -0.346 | -1.257 | -1.054 | 1.00 | 0.00 | Au |
| HETATM  | 4 AU  | LIG | 1 | 1.266  | 0.904  | -1.589 | 1.00 | 0.00 | Au |
| HETATM  | 5 AU  | LIG | 1 | -1.942 | -3.374 | -0.501 | 1.00 | 0.00 | Au |
| HETATM  | 6 AU  | LIG | 1 | -0.207 | 3.285  | 2.374  | 1.00 | 0.00 | Au |
| HETATM  | 7 AU  | LIG | 1 | 1.343  | 3.112  | 0.062  | 1.00 | 0.00 | Au |
| HETATM  | 8 AU  | LIG | 1 | -1.827 | 1.074  | 2.891  | 1.00 | 0.00 | Au |
| HETATM  | 9 AU  | LIG | 1 | -1.886 | -1.117 | 1.219  | 1.00 | 0.00 | Au |
| HETATM  | 10 AU | LIG | 1 | -0.275 | 1.052  | 0.689  | 1.00 | 0.00 | Au |



**Doped Au<sub>9</sub>Li cluster for doping at site C**

|        |    |    |     |   |        |        |        |      |      |    |
|--------|----|----|-----|---|--------|--------|--------|------|------|----|
| HETATM | 1  | AU | LIG | 1 | -0.451 | -3.389 | -2.614 | 1.00 | 0.00 | Au |
| HETATM | 2  | AU | LIG | 1 | 1.228  | -1.230 | -3.253 | 1.00 | 0.00 | Au |
| HETATM | 3  | AU | LIG | 1 | -0.301 | -1.159 | -1.043 | 1.00 | 0.00 | Au |
| HETATM | 4  | LI | LIG | 1 | 1.273  | 0.903  | -1.579 | 1.00 | 0.00 | Li |
| HETATM | 5  | AU | LIG | 1 | -2.007 | -3.355 | -0.401 | 1.00 | 0.00 | Au |
| HETATM | 6  | AU | LIG | 1 | -0.238 | 3.134  | 2.321  | 1.00 | 0.00 | Au |
| HETATM | 7  | AU | LIG | 1 | 1.365  | 3.094  | 0.016  | 1.00 | 0.00 | Au |
| HETATM | 8  | AU | LIG | 1 | -1.860 | 1.061  | 2.943  | 1.00 | 0.00 | Au |
| HETATM | 9  | AU | LIG | 1 | -1.866 | -1.103 | 1.208  | 1.00 | 0.00 | Au |
| HETATM | 10 | AU | LIG | 1 | -0.232 | 1.013  | 0.600  | 1.00 | 0.00 | Au |

**Doped Au<sub>9</sub>Li cluster for doping at site D**

|        |    |    |     |   |        |        |        |      |      |    |
|--------|----|----|-----|---|--------|--------|--------|------|------|----|
| HETATM | 1  | AU | LIG | 1 | -0.421 | -3.304 | -2.610 | 1.00 | 0.00 | Au |
| HETATM | 2  | AU | LIG | 1 | 1.215  | -1.265 | -3.247 | 1.00 | 0.00 | Au |
| HETATM | 3  | LI | LIG | 1 | -0.336 | -1.257 | -1.043 | 1.00 | 0.00 | Li |
| HETATM | 4  | AU | LIG | 1 | 1.257  | 0.874  | -1.595 | 1.00 | 0.00 | Au |
| HETATM | 5  | AU | LIG | 1 | -1.968 | -3.306 | -0.410 | 1.00 | 0.00 | Au |
| HETATM | 6  | AU | LIG | 1 | -0.206 | 3.226  | 2.332  | 1.00 | 0.00 | Au |
| HETATM | 7  | AU | LIG | 1 | 1.348  | 3.084  | 0.039  | 1.00 | 0.00 | Au |
| HETATM | 8  | AU | LIG | 1 | -1.830 | 1.044  | 2.875  | 1.00 | 0.00 | Au |
| HETATM | 9  | AU | LIG | 1 | -1.876 | -1.134 | 1.196  | 1.00 | 0.00 | Au |
| HETATM | 10 | AU | LIG | 1 | -0.273 | 1.006  | 0.660  | 1.00 | 0.00 | Au |

+++++

**Doped Au<sub>9</sub>Na cluster for doping at site A**

|        |    |    |     |   |        |        |        |      |      |    |
|--------|----|----|-----|---|--------|--------|--------|------|------|----|
| HETATM | 1  | AU | LIG | 1 | -0.421 | -3.406 | -2.671 | 1.00 | 0.00 | Au |
| HETATM | 2  | NA | LIG | 1 | 1.347  | -1.336 | -3.503 | 1.00 | 0.00 | Na |
| HETATM | 3  | AU | LIG | 1 | -0.308 | -1.219 | -1.072 | 1.00 | 0.00 | Au |
| HETATM | 4  | AU | LIG | 1 | 1.266  | 0.906  | -1.588 | 1.00 | 0.00 | Au |
| HETATM | 5  | AU | LIG | 1 | -1.999 | -3.245 | -0.325 | 1.00 | 0.00 | Au |
| HETATM | 6  | AU | LIG | 1 | -0.214 | 3.174  | 2.314  | 1.00 | 0.00 | Au |
| HETATM | 7  | AU | LIG | 1 | 1.360  | 3.157  | 0.090  | 1.00 | 0.00 | Au |
| HETATM | 8  | AU | LIG | 1 | -1.875 | 1.072  | 2.961  | 1.00 | 0.00 | Au |
| HETATM | 9  | AU | LIG | 1 | -1.949 | -1.128 | 1.306  | 1.00 | 0.00 | Au |
| HETATM | 10 | AU | LIG | 1 | -0.297 | 0.992  | 0.686  | 1.00 | 0.00 | Au |

**Doped Au<sub>9</sub>Na cluster for doping at site B**

|        |    |    |     |   |        |        |        |      |      |    |
|--------|----|----|-----|---|--------|--------|--------|------|------|----|
| HETATM | 1  | NA | LIG | 1 | -0.441 | -3.596 | -2.846 | 1.00 | 0.00 | Na |
| HETATM | 2  | AU | LIG | 1 | 1.229  | -1.283 | -3.265 | 1.00 | 0.00 | Au |
| HETATM | 3  | AU | LIG | 1 | -0.340 | -1.263 | -1.050 | 1.00 | 0.00 | Au |
| HETATM | 4  | AU | LIG | 1 | 1.271  | 0.928  | -1.561 | 1.00 | 0.00 | Au |
| HETATM | 5  | AU | LIG | 1 | -1.974 | -3.336 | -0.414 | 1.00 | 0.00 | Au |
| HETATM | 6  | AU | LIG | 1 | -0.209 | 3.302  | 2.383  | 1.00 | 0.00 | Au |
| HETATM | 7  | AU | LIG | 1 | 1.344  | 3.140  | 0.082  | 1.00 | 0.00 | Au |
| HETATM | 8  | AU | LIG | 1 | -1.822 | 1.100  | 2.916  | 1.00 | 0.00 | Au |
| HETATM | 9  | AU | LIG | 1 | -1.878 | -1.091 | 1.246  | 1.00 | 0.00 | Au |
| HETATM | 10 | AU | LIG | 1 | -0.270 | 1.066  | 0.706  | 1.00 | 0.00 | Au |

**Doped Au<sub>9</sub>Na cluster for doping at site C**

|        |    |    |     |   |        |        |        |      |      |    |
|--------|----|----|-----|---|--------|--------|--------|------|------|----|
| HETATM | 1  | AU | LIG | 1 | -0.526 | -3.457 | -2.571 | 1.00 | 0.00 | Au |
| HETATM | 2  | AU | LIG | 1 | 1.195  | -1.439 | -3.329 | 1.00 | 0.00 | Au |
| HETATM | 3  | AU | LIG | 1 | -0.279 | -1.162 | -1.065 | 1.00 | 0.00 | Au |
| HETATM | 4  | NA | LIG | 1 | 1.497  | 1.062  | -1.803 | 1.00 | 0.00 | Na |
| HETATM | 5  | AU | LIG | 1 | -2.047 | -3.353 | -0.358 | 1.00 | 0.00 | Au |
| HETATM | 6  | AU | LIG | 1 | -0.312 | 3.114  | 2.402  | 1.00 | 0.00 | Au |
| HETATM | 7  | AU | LIG | 1 | 1.324  | 3.238  | 0.183  | 1.00 | 0.00 | Au |
| HETATM | 8  | AU | LIG | 1 | -1.891 | 1.014  | 2.963  | 1.00 | 0.00 | Au |
| HETATM | 9  | AU | LIG | 1 | -1.837 | -1.084 | 1.184  | 1.00 | 0.00 | Au |
| HETATM | 10 | AU | LIG | 1 | -0.212 | 1.037  | 0.592  | 1.00 | 0.00 | Au |

**Doped Au<sub>9</sub>Na cluster for doping at site D**

|        |    |    |     |   |        |        |        |      |      |    |
|--------|----|----|-----|---|--------|--------|--------|------|------|----|
| HETATM | 1  | AU | LIG | 1 | -0.697 | -1.683 | -1.721 | 1.00 | 0.00 | Au |
| HETATM | 2  | AU | LIG | 1 | 1.071  | -1.400 | -3.706 | 1.00 | 0.00 | Au |
| HETATM | 3  | NA | LIG | 1 | 0.809  | -0.462 | 0.872  | 1.00 | 0.00 | Na |
| HETATM | 4  | AU | LIG | 1 | 0.787  | 0.722  | -2.067 | 1.00 | 0.00 | Au |
| HETATM | 5  | AU | LIG | 1 | -2.250 | -3.545 | -0.593 | 1.00 | 0.00 | Au |
| HETATM | 6  | AU | LIG | 1 | 1.009  | 2.037  | 2.794  | 1.00 | 0.00 | Au |
| HETATM | 7  | AU | LIG | 1 | 1.150  | 2.364  | 0.074  | 1.00 | 0.00 | Au |
| HETATM | 8  | AU | LIG | 1 | -1.407 | 0.826  | 2.324  | 1.00 | 0.00 | Au |
| HETATM | 9  | AU | LIG | 1 | -2.225 | -1.142 | 0.624  | 1.00 | 0.00 | Au |
| HETATM | 10 | AU | LIG | 1 | -1.337 | 1.251  | -0.404 | 1.00 | 0.00 | Au |

+++++

**Doped Au<sub>9</sub>K cluster for doping at site A**

|        |    |    |     |   |        |        |        |      |      |    |
|--------|----|----|-----|---|--------|--------|--------|------|------|----|
| HETATM | 1  | AU | LIG | 1 | -0.461 | -3.459 | -2.578 | 1.00 | 0.00 | Au |
| HETATM | 2  | K  | LIG | 1 | 1.575  | -1.383 | -3.932 | 1.00 | 0.00 | K  |
| HETATM | 3  | AU | LIG | 1 | -0.317 | -1.227 | -1.037 | 1.00 | 0.00 | Au |
| HETATM | 4  | AU | LIG | 1 | 1.265  | 0.898  | -1.518 | 1.00 | 0.00 | Au |
| HETATM | 5  | AU | LIG | 1 | -2.040 | -3.228 | -0.255 | 1.00 | 0.00 | Au |
| HETATM | 6  | AU | LIG | 1 | -0.239 | 3.195  | 2.344  | 1.00 | 0.00 | Au |
| HETATM | 7  | AU | LIG | 1 | 1.354  | 3.166  | 0.142  | 1.00 | 0.00 | Au |
| HETATM | 8  | AU | LIG | 1 | -1.911 | 1.107  | 2.991  | 1.00 | 0.00 | Au |
| HETATM | 9  | AU | LIG | 1 | -1.993 | -1.110 | 1.354  | 1.00 | 0.00 | Au |
| HETATM | 10 | AU | LIG | 1 | -0.323 | 0.995  | 0.727  | 1.00 | 0.00 | Au |

**Doped Au<sub>9</sub>K cluster for doping at site B**

|        |    |    |     |   |        |        |        |      |      |    |
|--------|----|----|-----|---|--------|--------|--------|------|------|----|
| HETATM | 1  | K  | LIG | 1 | 1.163  | -1.174 | 0.878  | 1.00 | 0.00 | K  |
| HETATM | 2  | AU | LIG | 1 | 0.894  | -0.904 | -3.935 | 1.00 | 0.00 | Au |
| HETATM | 3  | AU | LIG | 1 | -0.927 | -1.385 | -2.055 | 1.00 | 0.00 | Au |
| HETATM | 4  | AU | LIG | 1 | 0.720  | 0.907  | -1.926 | 1.00 | 0.00 | Au |
| HETATM | 5  | AU | LIG | 1 | -2.734 | -3.151 | -1.220 | 1.00 | 0.00 | Au |
| HETATM | 6  | AU | LIG | 1 | 0.837  | 1.719  | 2.837  | 1.00 | 0.00 | Au |
| HETATM | 7  | AU | LIG | 1 | 1.655  | 2.347  | 0.253  | 1.00 | 0.00 | Au |
| HETATM | 8  | AU | LIG | 1 | -1.557 | 0.314  | 2.697  | 1.00 | 0.00 | Au |
| HETATM | 9  | AU | LIG | 1 | -2.313 | -1.000 | 0.375  | 1.00 | 0.00 | Au |
| HETATM | 10 | AU | LIG | 1 | -0.827 | 1.296  | 0.294  | 1.00 | 0.00 | Au |

**Doped Au<sub>9</sub>K cluster for doping at site C**

|        |    |    |     |   |        |        |        |      |      |    |
|--------|----|----|-----|---|--------|--------|--------|------|------|----|
| HETATM | 1  | AU | LIG | 1 | -0.632 | -3.512 | -2.467 | 1.00 | 0.00 | Au |
| HETATM | 2  | AU | LIG | 1 | 1.098  | -1.640 | -3.430 | 1.00 | 0.00 | Au |
| HETATM | 3  | AU | LIG | 1 | -0.254 | -1.129 | -1.108 | 1.00 | 0.00 | Au |
| HETATM | 4  | K  | LIG | 1 | 1.955  | 1.257  | -2.077 | 1.00 | 0.00 | K  |
| HETATM | 5  | AU | LIG | 1 | -2.141 | -3.383 | -0.274 | 1.00 | 0.00 | Au |
| HETATM | 6  | AU | LIG | 1 | -0.416 | 3.033  | 2.485  | 1.00 | 0.00 | Au |
| HETATM | 7  | AU | LIG | 1 | 1.210  | 3.409  | 0.330  | 1.00 | 0.00 | Au |
| HETATM | 8  | AU | LIG | 1 | -1.946 | 0.924  | 3.042  | 1.00 | 0.00 | Au |
| HETATM | 9  | AU | LIG | 1 | -1.776 | -1.059 | 1.147  | 1.00 | 0.00 | Au |
| HETATM | 10 | AU | LIG | 1 | -0.188 | 1.068  | 0.550  | 1.00 | 0.00 | Au |

**Doped Au<sub>9</sub>K cluster for doping at site D**

|        |    |    |     |   |        |        |        |      |      |    |
|--------|----|----|-----|---|--------|--------|--------|------|------|----|
| HETATM | 1  | AU | LIG | 1 | -0.801 | -1.746 | -1.689 | 1.00 | 0.00 | Au |
| HETATM | 2  | AU | LIG | 1 | 0.966  | -1.622 | -3.683 | 1.00 | 0.00 | Au |
| HETATM | 3  | K  | LIG | 1 | 1.305  | -0.713 | 1.129  | 1.00 | 0.00 | K  |
| HETATM | 4  | AU | LIG | 1 | 0.716  | 0.585  | -2.133 | 1.00 | 0.00 | Au |
| HETATM | 5  | AU | LIG | 1 | -2.464 | -3.504 | -0.568 | 1.00 | 0.00 | Au |
| HETATM | 6  | AU | LIG | 1 | 0.634  | 2.464  | 2.367  | 1.00 | 0.00 | Au |
| HETATM | 7  | AU | LIG | 1 | 1.373  | 2.541  | -0.305 | 1.00 | 0.00 | Au |
| HETATM | 8  | AU | LIG | 1 | -1.594 | 0.821  | 2.519  | 1.00 | 0.00 | Au |
| HETATM | 9  | AU | LIG | 1 | -2.245 | -1.091 | 0.638  | 1.00 | 0.00 | Au |
| HETATM | 10 | AU | LIG | 1 | -0.980 | 1.234  | -0.078 | 1.00 | 0.00 | Au |

+++++

**Doped Au<sub>9</sub>Rb cluster for doping at site A**

|        |    |    |     |   |        |        |        |      |      |    |
|--------|----|----|-----|---|--------|--------|--------|------|------|----|
| HETATM | 1  | AU | LIG | 1 | -1.100 | -2.907 | -3.324 | 1.00 | 0.00 | Au |
| HETATM | 2  | RB | LIG | 1 | 1.895  | -1.627 | -0.573 | 1.00 | 0.00 | Rb |
| HETATM | 3  | AU | LIG | 1 | -1.163 | -0.843 | -1.622 | 1.00 | 0.00 | Au |
| HETATM | 4  | AU | LIG | 1 | -0.276 | 1.606  | -2.246 | 1.00 | 0.00 | Au |
| HETATM | 5  | AU | LIG | 1 | -1.351 | -3.440 | -0.603 | 1.00 | 0.00 | Au |
| HETATM | 6  | AU | LIG | 1 | 0.456  | 2.841  | 2.216  | 1.00 | 0.00 | Au |
| HETATM | 7  | AU | LIG | 1 | 0.711  | 3.473  | -0.412 | 1.00 | 0.00 | Au |
| HETATM | 8  | AU | LIG | 1 | -0.593 | 0.455  | 3.072  | 1.00 | 0.00 | Au |
| HETATM | 9  | AU | LIG | 1 | -1.171 | -1.595 | 1.299  | 1.00 | 0.00 | Au |
| HETATM | 10 | AU | LIG | 1 | -0.497 | 1.004  | 0.392  | 1.00 | 0.00 | Au |

**Doped Au<sub>9</sub>Rb cluster for doping at site B**

|        |    |    |     |   |        |        |        |      |      |    |
|--------|----|----|-----|---|--------|--------|--------|------|------|----|
| HETATM | 1  | RB | LIG | 1 | 1.338  | -1.531 | 0.699  | 1.00 | 0.00 | Rb |
| HETATM | 2  | AU | LIG | 1 | 0.292  | -0.854 | -4.083 | 1.00 | 0.00 | Au |
| HETATM | 3  | AU | LIG | 1 | -1.250 | -1.134 | -1.924 | 1.00 | 0.00 | Au |
| HETATM | 4  | AU | LIG | 1 | 0.668  | 0.913  | -2.057 | 1.00 | 0.00 | Au |
| HETATM | 5  | AU | LIG | 1 | -3.067 | -2.890 | -1.067 | 1.00 | 0.00 | Au |
| HETATM | 6  | AU | LIG | 1 | 1.249  | 1.627  | 2.716  | 1.00 | 0.00 | Au |
| HETATM | 7  | AU | LIG | 1 | 1.856  | 2.218  | 0.068  | 1.00 | 0.00 | Au |
| HETATM | 8  | AU | LIG | 1 | -1.215 | 0.344  | 2.837  | 1.00 | 0.00 | Au |
| HETATM | 9  | AU | LIG | 1 | -2.344 | -0.919 | 0.655  | 1.00 | 0.00 | Au |
| HETATM | 10 | AU | LIG | 1 | -0.618 | 1.194  | 0.352  | 1.00 | 0.00 | Au |

**Doped Au<sub>9</sub>Rb cluster for doping at site C**

|        |       |     |   |        |        |        |      |      |    |
|--------|-------|-----|---|--------|--------|--------|------|------|----|
| HETATM | 1 AU  | LIG | 1 | -0.365 | -3.439 | -2.534 | 1.00 | 0.00 | Au |
| HETATM | 2 AU  | LIG | 1 | 1.707  | -1.663 | -2.877 | 1.00 | 0.00 | Au |
| HETATM | 3 AU  | LIG | 1 | -0.031 | -1.306 | -0.837 | 1.00 | 0.00 | Au |
| HETATM | 4 RB  | LIG | 1 | 0.230  | 1.662  | -2.623 | 1.00 | 0.00 | Rb |
| HETATM | 5 AU  | LIG | 1 | -2.154 | -3.270 | -0.521 | 1.00 | 0.00 | Au |
| HETATM | 6 AU  | LIG | 1 | -0.248 | 3.095  | 2.377  | 1.00 | 0.00 | Au |
| HETATM | 7 AU  | LIG | 1 | 1.743  | 2.917  | 0.484  | 1.00 | 0.00 | Au |
| HETATM | 8 AU  | LIG | 1 | -2.036 | 1.128  | 2.845  | 1.00 | 0.00 | Au |
| HETATM | 9 AU  | LIG | 1 | -1.938 | -1.027 | 1.099  | 1.00 | 0.00 | Au |
| HETATM | 10 AU | LIG | 1 | 0.001  | 0.873  | 0.785  | 1.00 | 0.00 | Au |

**Doped Au<sub>9</sub>Rb cluster for doping at site D**

|        |       |     |   |        |        |        |      |      |    |
|--------|-------|-----|---|--------|--------|--------|------|------|----|
| HETATM | 1 AU  | LIG | 1 | -0.790 | -1.796 | -1.775 | 1.00 | 0.00 | Au |
| HETATM | 2 AU  | LIG | 1 | 0.908  | -1.120 | -3.685 | 1.00 | 0.00 | Au |
| HETATM | 3 RB  | LIG | 1 | 1.215  | -1.372 | 1.226  | 1.00 | 0.00 | Rb |
| HETATM | 4 AU  | LIG | 1 | 0.568  | 0.627  | -1.646 | 1.00 | 0.00 | Au |
| HETATM | 5 AU  | LIG | 1 | -2.311 | -3.883 | -1.096 | 1.00 | 0.00 | Au |
| HETATM | 6 AU  | LIG | 1 | -0.760 | 2.742  | 3.111  | 1.00 | 0.00 | Au |
| HETATM | 7 AU  | LIG | 1 | 1.868  | 2.940  | -1.119 | 1.00 | 0.00 | Au |
| HETATM | 8 AU  | LIG | 1 | -1.699 | 0.459  | 1.932  | 1.00 | 0.00 | Au |
| HETATM | 9 AU  | LIG | 1 | -2.223 | -1.713 | 0.566  | 1.00 | 0.00 | Au |
| HETATM | 10 AU | LIG | 1 | 0.133  | 2.085  | 0.683  | 1.00 | 0.00 | Au |

+++++

**Doped Au<sub>9</sub>Be cluster for doping at site A**

|        |       |     |   |        |        |        |      |      |    |
|--------|-------|-----|---|--------|--------|--------|------|------|----|
| HETATM | 1 AU  | LIG | 1 | 0.157  | -2.999 | -3.161 | 1.00 | 0.00 | Au |
| HETATM | 2 BE  | LIG | 1 | 0.965  | -1.058 | -2.740 | 1.00 | 0.00 | Be |
| HETATM | 3 AU  | LIG | 1 | -0.470 | -1.397 | -0.990 | 1.00 | 0.00 | Au |
| HETATM | 4 AU  | LIG | 1 | 1.299  | 0.785  | -1.726 | 1.00 | 0.00 | Au |
| HETATM | 5 AU  | LIG | 1 | -2.217 | -3.335 | -0.086 | 1.00 | 0.00 | Au |
| HETATM | 6 AU  | LIG | 1 | -0.129 | 3.059  | 2.103  | 1.00 | 0.00 | Au |
| HETATM | 7 AU  | LIG | 1 | 1.451  | 3.076  | -0.099 | 1.00 | 0.00 | Au |
| HETATM | 8 AU  | LIG | 1 | -1.863 | 1.087  | 2.950  | 1.00 | 0.00 | Au |
| HETATM | 9 AU  | LIG | 1 | -2.005 | -1.128 | 1.382  | 1.00 | 0.00 | Au |
| HETATM | 10 AU | LIG | 1 | -0.278 | 0.878  | 0.564  | 1.00 | 0.00 | Au |

**Doped Au<sub>9</sub>Be cluster for doping at site B**

|        |       |     |   |        |        |        |      |      |    |
|--------|-------|-----|---|--------|--------|--------|------|------|----|
| HETATM | 1 BE  | LIG | 1 | -0.885 | -2.566 | -1.192 | 1.00 | 0.00 | Be |
| HETATM | 2 AU  | LIG | 1 | 0.100  | -3.021 | -3.076 | 1.00 | 0.00 | Au |
| HETATM | 3 AU  | LIG | 1 | 0.343  | -0.694 | -1.648 | 1.00 | 0.00 | Au |
| HETATM | 4 AU  | LIG | 1 | 1.695  | 1.723  | -1.851 | 1.00 | 0.00 | Au |
| HETATM | 5 AU  | LIG | 1 | -2.253 | -3.743 | 0.018  | 1.00 | 0.00 | Au |
| HETATM | 6 AU  | LIG | 1 | -0.316 | 3.076  | 2.278  | 1.00 | 0.00 | Au |
| HETATM | 7 AU  | LIG | 1 | 1.298  | 3.560  | 0.172  | 1.00 | 0.00 | Au |
| HETATM | 8 AU  | LIG | 1 | -1.693 | 0.701  | 2.572  | 1.00 | 0.00 | Au |
| HETATM | 9 AU  | LIG | 1 | -1.363 | -1.214 | 0.588  | 1.00 | 0.00 | Au |
| HETATM | 10 AU | LIG | 1 | -0.015 | 1.146  | 0.336  | 1.00 | 0.00 | Au |

**Doped Au<sub>9</sub>Be cluster for doping at site C**

|        |    |    |     |   |        |        |        |      |      |    |
|--------|----|----|-----|---|--------|--------|--------|------|------|----|
| HETATM | 1  | AU | LIG | 1 | -0.326 | -3.239 | -2.665 | 1.00 | 0.00 | Au |
| HETATM | 2  | AU | LIG | 1 | 1.398  | -0.633 | -2.998 | 1.00 | 0.00 | Au |
| HETATM | 3  | AU | LIG | 1 | -0.364 | -1.185 | -0.970 | 1.00 | 0.00 | Au |
| HETATM | 4  | BE | LIG | 1 | 0.937  | 0.695  | -1.286 | 1.00 | 0.00 | Be |
| HETATM | 5  | AU | LIG | 1 | -1.978 | -3.343 | -0.434 | 1.00 | 0.00 | Au |
| HETATM | 6  | AU | LIG | 1 | -0.127 | 3.136  | 2.161  | 1.00 | 0.00 | Au |
| HETATM | 7  | AU | LIG | 1 | 1.502  | 2.682  | -0.487 | 1.00 | 0.00 | Au |
| HETATM | 8  | AU | LIG | 1 | -1.842 | 1.086  | 2.916  | 1.00 | 0.00 | Au |
| HETATM | 9  | AU | LIG | 1 | -1.992 | -1.181 | 1.314  | 1.00 | 0.00 | Au |
| HETATM | 10 | AU | LIG | 1 | -0.297 | 0.951  | 0.647  | 1.00 | 0.00 | Au |

**Doped Au<sub>9</sub>Be cluster for doping at site D**

|        |    |    |     |   |        |        |        |      |      |    |
|--------|----|----|-----|---|--------|--------|--------|------|------|----|
| HETATM | 1  | AU | LIG | 1 | -0.766 | -2.779 | -1.693 | 1.00 | 0.00 | Au |
| HETATM | 2  | AU | LIG | 1 | 1.053  | -1.332 | -3.078 | 1.00 | 0.00 | Au |
| HETATM | 3  | BE | LIG | 1 | 0.049  | -0.699 | -1.161 | 1.00 | 0.00 | Be |
| HETATM | 4  | AU | LIG | 1 | 1.512  | 1.072  | -1.799 | 1.00 | 0.00 | Au |
| HETATM | 5  | AU | LIG | 1 | -2.585 | -3.763 | 0.068  | 1.00 | 0.00 | Au |
| HETATM | 6  | AU | LIG | 1 | -0.278 | 3.002  | 2.277  | 1.00 | 0.00 | Au |
| HETATM | 7  | AU | LIG | 1 | 1.383  | 3.169  | 0.064  | 1.00 | 0.00 | Au |
| HETATM | 8  | AU | LIG | 1 | -1.787 | 0.669  | 2.534  | 1.00 | 0.00 | Au |
| HETATM | 9  | AU | LIG | 1 | -1.547 | -1.326 | 0.577  | 1.00 | 0.00 | Au |
| HETATM | 10 | AU | LIG | 1 | -0.124 | 0.955  | 0.409  | 1.00 | 0.00 | Au |

+++++

**Doped Au<sub>9</sub>Mg cluster for doping at site A**

|        |    |    |     |   |        |        |        |      |      |    |
|--------|----|----|-----|---|--------|--------|--------|------|------|----|
| HETATM | 1  | AU | LIG | 1 | -0.325 | -3.289 | -2.728 | 1.00 | 0.00 | Au |
| HETATM | 2  | MG | LIG | 1 | 1.207  | -1.183 | -3.191 | 1.00 | 0.00 | Mg |
| HETATM | 3  | AU | LIG | 1 | -0.364 | -1.221 | -0.994 | 1.00 | 0.00 | Au |
| HETATM | 4  | AU | LIG | 1 | 1.325  | 0.901  | -1.672 | 1.00 | 0.00 | Au |
| HETATM | 5  | AU | LIG | 1 | -2.034 | -3.322 | -0.314 | 1.00 | 0.00 | Au |
| HETATM | 6  | AU | LIG | 1 | -0.180 | 3.116  | 2.233  | 1.00 | 0.00 | Au |
| HETATM | 7  | AU | LIG | 1 | 1.407  | 3.129  | -0.001 | 1.00 | 0.00 | Au |
| HETATM | 8  | AU | LIG | 1 | -1.881 | 1.038  | 2.927  | 1.00 | 0.00 | Au |
| HETATM | 9  | AU | LIG | 1 | -1.973 | -1.160 | 1.314  | 1.00 | 0.00 | Au |
| HETATM | 10 | AU | LIG | 1 | -0.273 | 0.959  | 0.624  | 1.00 | 0.00 | Au |

**Doped Au<sub>9</sub>Mg cluster for doping at site B**

|        |    |    |     |   |        |        |        |      |      |    |
|--------|----|----|-----|---|--------|--------|--------|------|------|----|
| HETATM | 1  | MG | LIG | 1 | -0.395 | -3.482 | -2.710 | 1.00 | 0.00 | Mg |
| HETATM | 2  | AU | LIG | 1 | 1.164  | -1.377 | -3.270 | 1.00 | 0.00 | Au |
| HETATM | 3  | AU | LIG | 1 | -0.356 | -1.232 | -1.045 | 1.00 | 0.00 | Au |
| HETATM | 4  | AU | LIG | 1 | 1.264  | 0.926  | -1.582 | 1.00 | 0.00 | Au |
| HETATM | 5  | AU | LIG | 1 | -1.929 | -3.360 | -0.517 | 1.00 | 0.00 | Au |
| HETATM | 6  | AU | LIG | 1 | -0.197 | 3.324  | 2.412  | 1.00 | 0.00 | Au |
| HETATM | 7  | AU | LIG | 1 | 1.352  | 3.113  | 0.068  | 1.00 | 0.00 | Au |
| HETATM | 8  | AU | LIG | 1 | -1.820 | 1.074  | 2.902  | 1.00 | 0.00 | Au |
| HETATM | 9  | AU | LIG | 1 | -1.896 | -1.099 | 1.232  | 1.00 | 0.00 | Au |
| HETATM | 10 | AU | LIG | 1 | -0.278 | 1.082  | 0.708  | 1.00 | 0.00 | Au |

**Doped Au<sub>9</sub>Mg cluster for doping at site C**

|        |       |     |   |        |        |        |      |      |    |
|--------|-------|-----|---|--------|--------|--------|------|------|----|
| HETATM | 1 AU  | LIG | 1 | -0.411 | -3.338 | -2.611 | 1.00 | 0.00 | Au |
| HETATM | 2 AU  | LIG | 1 | 1.290  | -1.098 | -3.253 | 1.00 | 0.00 | Au |
| HETATM | 3 AU  | LIG | 1 | -0.337 | -1.181 | -0.994 | 1.00 | 0.00 | Au |
| HETATM | 4 MG  | LIG | 1 | 1.265  | 0.906  | -1.583 | 1.00 | 0.00 | Mg |
| HETATM | 5 AU  | LIG | 1 | -2.016 | -3.342 | -0.373 | 1.00 | 0.00 | Au |
| HETATM | 6 AU  | LIG | 1 | -0.206 | 3.118  | 2.267  | 1.00 | 0.00 | Au |
| HETATM | 7 AU  | LIG | 1 | 1.439  | 3.047  | -0.101 | 1.00 | 0.00 | Au |
| HETATM | 8 AU  | LIG | 1 | -1.888 | 1.039  | 2.926  | 1.00 | 0.00 | Au |
| HETATM | 9 AU  | LIG | 1 | -1.956 | -1.158 | 1.286  | 1.00 | 0.00 | Au |
| HETATM | 10 AU | LIG | 1 | -0.268 | 0.973  | 0.635  | 1.00 | 0.00 | Au |

**Doped Au<sub>9</sub>Mg cluster for doping at site D**

|        |       |     |   |        |        |        |      |      |    |
|--------|-------|-----|---|--------|--------|--------|------|------|----|
| HETATM | 1 AU  | LIG | 1 | -0.420 | -3.382 | -2.666 | 1.00 | 0.00 | Au |
| HETATM | 2 AU  | LIG | 1 | 1.219  | -1.230 | -3.248 | 1.00 | 0.00 | Au |
| HETATM | 3 MG  | LIG | 1 | -0.345 | -1.242 | -1.041 | 1.00 | 0.00 | Mg |
| HETATM | 4 AU  | LIG | 1 | 1.295  | 0.896  | -1.627 | 1.00 | 0.00 | Au |
| HETATM | 5 AU  | LIG | 1 | -1.985 | -3.290 | -0.386 | 1.00 | 0.00 | Au |
| HETATM | 6 AU  | LIG | 1 | -0.210 | 3.260  | 2.353  | 1.00 | 0.00 | Au |
| HETATM | 7 AU  | LIG | 1 | 1.339  | 3.079  | 0.070  | 1.00 | 0.00 | Au |
| HETATM | 8 AU  | LIG | 1 | -1.808 | 1.064  | 2.870  | 1.00 | 0.00 | Au |
| HETATM | 9 AU  | LIG | 1 | -1.908 | -1.160 | 1.231  | 1.00 | 0.00 | Au |
| HETATM | 10 AU | LIG | 1 | -0.267 | 0.973  | 0.642  | 1.00 | 0.00 | Au |

+++++

**Doped Au<sub>9</sub>Ca cluster for doping at site A**

|        |       |     |   |        |        |        |      |      |    |
|--------|-------|-----|---|--------|--------|--------|------|------|----|
| HETATM | 1 AU  | LIG | 1 | -0.417 | -3.394 | -2.646 | 1.00 | 0.00 | Au |
| HETATM | 2 CA  | LIG | 1 | 1.403  | -1.247 | -3.519 | 1.00 | 0.00 | Ca |
| HETATM | 3 AU  | LIG | 1 | -0.338 | -1.209 | -1.010 | 1.00 | 0.00 | Au |
| HETATM | 4 AU  | LIG | 1 | 1.323  | 0.957  | -1.624 | 1.00 | 0.00 | Au |
| HETATM | 5 AU  | LIG | 1 | -2.062 | -3.277 | -0.276 | 1.00 | 0.00 | Au |
| HETATM | 6 AU  | LIG | 1 | -0.209 | 3.109  | 2.259  | 1.00 | 0.00 | Au |
| HETATM | 7 AU  | LIG | 1 | 1.386  | 3.175  | 0.051  | 1.00 | 0.00 | Au |
| HETATM | 8 AU  | LIG | 1 | -1.902 | 1.034  | 2.974  | 1.00 | 0.00 | Au |
| HETATM | 9 AU  | LIG | 1 | -1.987 | -1.137 | 1.340  | 1.00 | 0.00 | Au |
| HETATM | 10 AU | LIG | 1 | -0.287 | 0.956  | 0.649  | 1.00 | 0.00 | Au |

**Doped Au<sub>9</sub>Ca cluster for doping at site B**

|        |       |     |   |        |        |        |      |      |    |
|--------|-------|-----|---|--------|--------|--------|------|------|----|
| HETATM | 1 CA  | LIG | 1 | -0.420 | -3.555 | -2.793 | 1.00 | 0.00 | Ca |
| HETATM | 2 AU  | LIG | 1 | 1.277  | -1.240 | -3.319 | 1.00 | 0.00 | Au |
| HETATM | 3 AU  | LIG | 1 | -0.343 | -1.196 | -1.004 | 1.00 | 0.00 | Au |
| HETATM | 4 AU  | LIG | 1 | 1.306  | 0.970  | -1.593 | 1.00 | 0.00 | Au |
| HETATM | 5 AU  | LIG | 1 | -2.035 | -3.362 | -0.367 | 1.00 | 0.00 | Au |
| HETATM | 6 AU  | LIG | 1 | -0.199 | 3.222  | 2.337  | 1.00 | 0.00 | Au |
| HETATM | 7 AU  | LIG | 1 | 1.391  | 3.140  | 0.020  | 1.00 | 0.00 | Au |
| HETATM | 8 AU  | LIG | 1 | -1.869 | 1.043  | 2.936  | 1.00 | 0.00 | Au |
| HETATM | 9 AU  | LIG | 1 | -1.925 | -1.103 | 1.291  | 1.00 | 0.00 | Au |
| HETATM | 10 AU | LIG | 1 | -0.273 | 1.048  | 0.691  | 1.00 | 0.00 | Au |

**Doped Au<sub>9</sub>Ca cluster for doping at site C**

|        |       |     |   |        |        |        |      |      |    |
|--------|-------|-----|---|--------|--------|--------|------|------|----|
| HETATM | 1 AU  | LIG | 1 | -0.521 | -3.424 | -2.545 | 1.00 | 0.00 | Au |
| HETATM | 2 AU  | LIG | 1 | 1.243  | -1.381 | -3.380 | 1.00 | 0.00 | Au |
| HETATM | 3 AU  | LIG | 1 | -0.305 | -1.168 | -1.028 | 1.00 | 0.00 | Au |
| HETATM | 4 CA  | LIG | 1 | 1.552  | 1.098  | -1.849 | 1.00 | 0.00 | Ca |
| HETATM | 5 AU  | LIG | 1 | -2.057 | -3.351 | -0.316 | 1.00 | 0.00 | Au |
| HETATM | 6 AU  | LIG | 1 | -0.313 | 3.082  | 2.374  | 1.00 | 0.00 | Au |
| HETATM | 7 AU  | LIG | 1 | 1.383  | 3.261  | 0.119  | 1.00 | 0.00 | Au |
| HETATM | 8 AU  | LIG | 1 | -1.922 | 0.985  | 2.958  | 1.00 | 0.00 | Au |
| HETATM | 9 AU  | LIG | 1 | -1.909 | -1.137 | 1.257  | 1.00 | 0.00 | Au |
| HETATM | 10 AU | LIG | 1 | -0.239 | 1.003  | 0.609  | 1.00 | 0.00 | Au |

**Doped Au<sub>9</sub>Ca cluster for doping at site D**

|        |       |     |   |        |        |        |      |      |    |
|--------|-------|-----|---|--------|--------|--------|------|------|----|
| HETATM | 1 AU  | LIG | 1 | -0.269 | -3.529 | -2.612 | 1.00 | 0.00 | Au |
| HETATM | 2 AU  | LIG | 1 | 1.356  | -1.295 | -3.208 | 1.00 | 0.00 | Au |
| HETATM | 3 CA  | LIG | 1 | -1.059 | -0.884 | -1.549 | 1.00 | 0.00 | Ca |
| HETATM | 4 AU  | LIG | 1 | 1.370  | 0.900  | -1.615 | 1.00 | 0.00 | Au |
| HETATM | 5 AU  | LIG | 1 | -1.820 | -3.431 | -0.251 | 1.00 | 0.00 | Au |
| HETATM | 6 AU  | LIG | 1 | -0.126 | 3.284  | 2.465  | 1.00 | 0.00 | Au |
| HETATM | 7 AU  | LIG | 1 | 1.276  | 3.103  | 0.059  | 1.00 | 0.00 | Au |
| HETATM | 8 AU  | LIG | 1 | -1.763 | 1.065  | 2.880  | 1.00 | 0.00 | Au |
| HETATM | 9 AU  | LIG | 1 | -1.813 | -1.238 | 1.346  | 1.00 | 0.00 | Au |
| HETATM | 10 AU | LIG | 1 | -0.242 | 0.994  | 0.684  | 1.00 | 0.00 | Au |

+++++

**Doped Au<sub>9</sub>Sr cluster for doping at site A**

|        |       |     |   |        |        |        |      |      |    |
|--------|-------|-----|---|--------|--------|--------|------|------|----|
| HETATM | 1 AU  | LIG | 1 | -0.426 | -3.413 | -2.670 | 1.00 | 0.00 | Au |
| HETATM | 2 SR  | LIG | 1 | 1.417  | -1.254 | -3.537 | 1.00 | 0.00 | Sr |
| HETATM | 3 AU  | LIG | 1 | -0.335 | -1.205 | -1.016 | 1.00 | 0.00 | Au |
| HETATM | 4 AU  | LIG | 1 | 1.319  | 0.963  | -1.621 | 1.00 | 0.00 | Au |
| HETATM | 5 AU  | LIG | 1 | -2.042 | -3.254 | -0.273 | 1.00 | 0.00 | Au |
| HETATM | 6 AU  | LIG | 1 | -0.206 | 3.107  | 2.251  | 1.00 | 0.00 | Au |
| HETATM | 7 AU  | LIG | 1 | 1.389  | 3.175  | 0.047  | 1.00 | 0.00 | Au |
| HETATM | 8 AU  | LIG | 1 | -1.913 | 1.036  | 2.989  | 1.00 | 0.00 | Au |
| HETATM | 9 AU  | LIG | 1 | -1.995 | -1.139 | 1.369  | 1.00 | 0.00 | Au |
| HETATM | 10 AU | LIG | 1 | -0.298 | 0.953  | 0.659  | 1.00 | 0.00 | Au |

**Doped Au<sub>9</sub>Sr cluster for doping at site B**

|        |       |     |   |        |        |        |      |      |    |
|--------|-------|-----|---|--------|--------|--------|------|------|----|
| HETATM | 1 SR  | LIG | 1 | -0.422 | -3.600 | -2.827 | 1.00 | 0.00 | Sr |
| HETATM | 2 AU  | LIG | 1 | 1.279  | -1.238 | -3.343 | 1.00 | 0.00 | Au |
| HETATM | 3 AU  | LIG | 1 | -0.345 | -1.213 | -1.019 | 1.00 | 0.00 | Au |
| HETATM | 4 AU  | LIG | 1 | 1.292  | 0.961  | -1.576 | 1.00 | 0.00 | Au |
| HETATM | 5 AU  | LIG | 1 | -2.039 | -3.386 | -0.360 | 1.00 | 0.00 | Au |
| HETATM | 6 AU  | LIG | 1 | -0.199 | 3.267  | 2.369  | 1.00 | 0.00 | Au |
| HETATM | 7 AU  | LIG | 1 | 1.384  | 3.133  | 0.051  | 1.00 | 0.00 | Au |
| HETATM | 8 AU  | LIG | 1 | -1.858 | 1.068  | 2.923  | 1.00 | 0.00 | Au |
| HETATM | 9 AU  | LIG | 1 | -1.908 | -1.091 | 1.276  | 1.00 | 0.00 | Au |
| HETATM | 10 AU | LIG | 1 | -0.273 | 1.067  | 0.703  | 1.00 | 0.00 | Au |

**Doped Au<sub>9</sub>Sr cluster for doping at site C**

|        |    |    |     |   |        |        |        |      |      |    |
|--------|----|----|-----|---|--------|--------|--------|------|------|----|
| HETATM | 1  | AU | LIG | 1 | -0.558 | -3.430 | -2.526 | 1.00 | 0.00 | Au |
| HETATM | 2  | AU | LIG | 1 | 1.218  | -1.439 | -3.407 | 1.00 | 0.00 | Au |
| HETATM | 3  | AU | LIG | 1 | -0.297 | -1.149 | -1.043 | 1.00 | 0.00 | Au |
| HETATM | 4  | SR | LIG | 1 | 1.637  | 1.140  | -1.909 | 1.00 | 0.00 | Sr |
| HETATM | 5  | AU | LIG | 1 | -2.061 | -3.357 | -0.293 | 1.00 | 0.00 | Au |
| HETATM | 6  | AU | LIG | 1 | -0.346 | 3.064  | 2.388  | 1.00 | 0.00 | Au |
| HETATM | 7  | AU | LIG | 1 | 1.386  | 3.288  | 0.187  | 1.00 | 0.00 | Au |
| HETATM | 8  | AU | LIG | 1 | -1.941 | 0.972  | 2.962  | 1.00 | 0.00 | Au |
| HETATM | 9  | AU | LIG | 1 | -1.902 | -1.131 | 1.249  | 1.00 | 0.00 | Au |
| HETATM | 10 | AU | LIG | 1 | -0.227 | 1.009  | 0.591  | 1.00 | 0.00 | Au |

**Doped Au<sub>9</sub>Sr cluster for doping at site D**

|        |    |    |     |   |        |        |        |      |      |    |
|--------|----|----|-----|---|--------|--------|--------|------|------|----|
| HETATM | 1  | AU | LIG | 1 | -0.146 | -3.580 | -2.488 | 1.00 | 0.00 | Au |
| HETATM | 2  | AU | LIG | 1 | 1.556  | -1.435 | -2.983 | 1.00 | 0.00 | Au |
| HETATM | 3  | SR | LIG | 1 | -1.155 | -0.793 | -1.705 | 1.00 | 0.00 | Sr |
| HETATM | 4  | AU | LIG | 1 | 1.531  | 0.787  | -1.464 | 1.00 | 0.00 | Au |
| HETATM | 5  | AU | LIG | 1 | -1.782 | -3.412 | -0.243 | 1.00 | 0.00 | Au |
| HETATM | 6  | AU | LIG | 1 | -0.354 | 3.405  | 2.294  | 1.00 | 0.00 | Au |
| HETATM | 7  | AU | LIG | 1 | 1.285  | 3.080  | 0.063  | 1.00 | 0.00 | Au |
| HETATM | 8  | AU | LIG | 1 | -1.962 | 1.167  | 2.712  | 1.00 | 0.00 | Au |
| HETATM | 9  | AU | LIG | 1 | -1.850 | -1.212 | 1.308  | 1.00 | 0.00 | Au |
| HETATM | 10 | AU | LIG | 1 | -0.212 | 0.961  | 0.704  | 1.00 | 0.00 | Au |

+++++



### (3) Variation in Interaction Energy (IE)

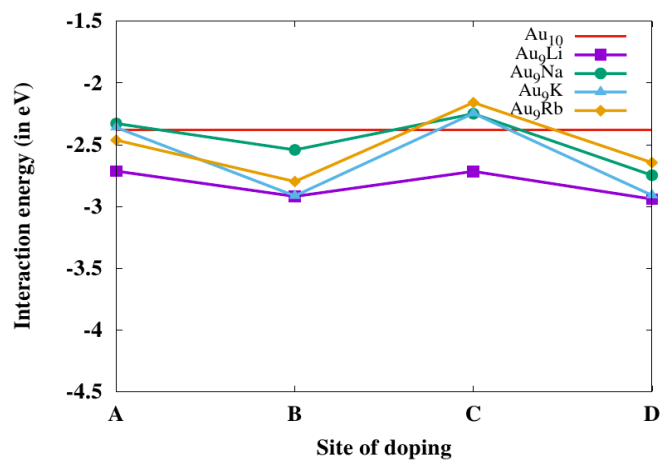

(a) Alkali dopants

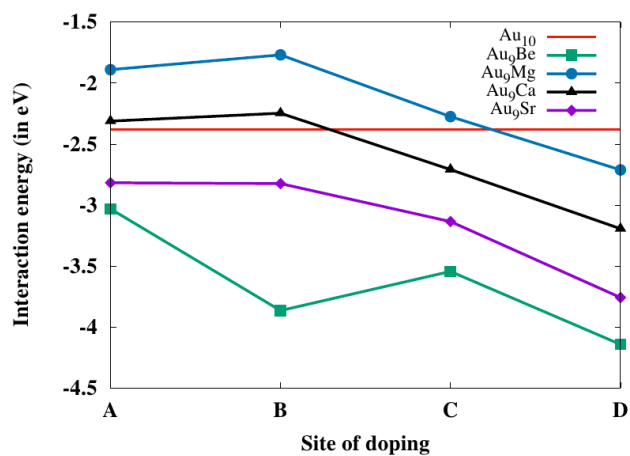

(b) Alkaline earth dopants

**Figure S1:** Variation in the Interaction Energy (IE) of doped gold clusters ( $\text{Au}_9 \text{X}$ ) in eV with respect to the site of doping for (a) alkali atoms and (b) alkaline earth atoms as dopant.
